# Supplementary material for: Synthesis of hollow rod-like hierarchical structures assembled by CoFe/C nanosheets for enhanced microwave absorption
Source: Royal Society of Chemistry journal article supplement (doi:10.1039/d1tc02984c), 2021-01-01
Supplement: d1tc02984c1.pdf [file d1tc02984c1.pdf]

## Supplementary Information

### Synthesis of Hollow Rod-like Hierarchical Structures Assembled by CoFe/C Nanosheets for Enhanced Microwave Absorption

Susu Bao,<sup>a</sup> Zhijia Song,<sup>a</sup> Runjing Mao,<sup>a</sup> Yue Li,<sup>b</sup> Shuhong Zhang,<sup>a</sup> Zhiyuan Jiang,<sup>\*,a</sup>

Xueai Li,<sup>\*,b</sup> and Zhaoxiong Xie<sup>a</sup>

<sup>a</sup> State Key Laboratory of Physical Chemistry of Solid Surfaces, and College of Chemistry and Chemical Engineering, Xiamen University, Xiamen 361005, China. Tel: +86-5922182432, Fax: +86-5922183047.

<sup>b</sup> School of Environmental and Chemical Engineering, Yanshan University, Qinhuangdao, 066004, Hebei, P. R. China.

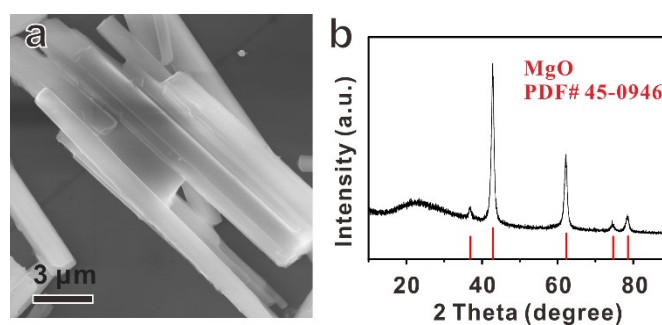

**Figure S1.** (a) SEM image and (b) XRD pattern of MgO micro-rods.

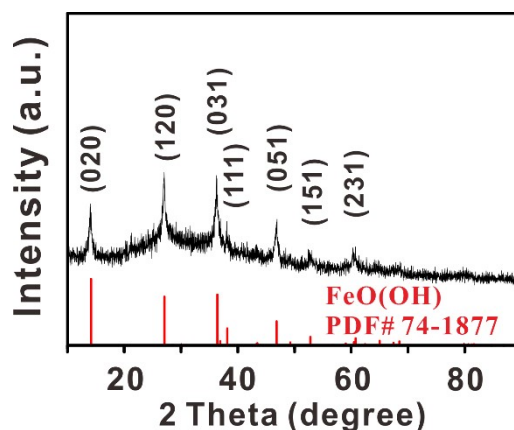

**Figure S2.** XRD pattern of as prepared  $\text{Co}_{0.5}\text{Fe}_{0.5}\text{O}(\text{OH})$  precursors.

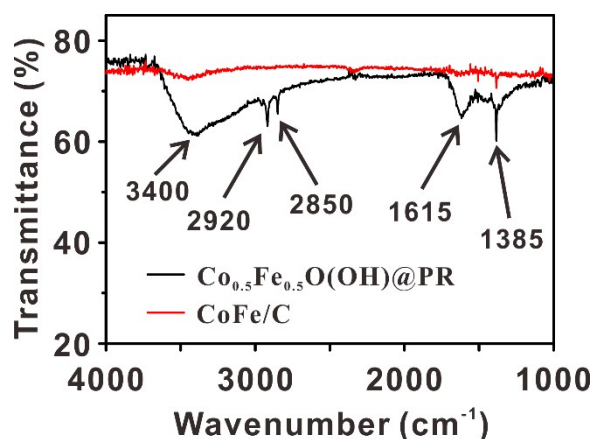

**Figure S3.** FT-IR spectra of  $\text{Co}_{0.5}\text{Fe}_{0.5}\text{O}(\text{OH})@\text{PR}$  and  $\text{CoFe}/\text{C}$ . For  $\text{CoFe}/\text{C}$ , the peak around  $3400\text{ cm}^{-1}$  is O–H stretching band, the peak around  $1385\text{ cm}^{-1}$  is O–H in-plane stretching band. For  $\text{Co}_{0.5}\text{Fe}_{0.5}\text{O}(\text{OH})@\text{PR}$ , the peaks at  $2920$ ,  $2850$  and  $1615\text{ cm}^{-1}$  belong to phenolic resin, which can be identified as  $-\text{CH}_2-$  in-phase stretching vibrations,  $-\text{CH}_2-$  out-of-phase stretching vibrations, and the aromatic ring stretching band, respectively.

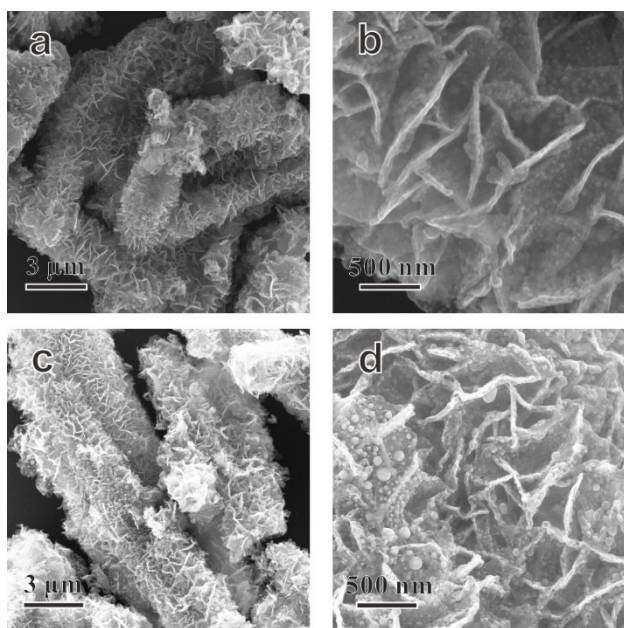

**Figure S4.** (a), (b) SEM images of  $\text{CoFe}/\text{C}-\text{M}$  and (c), (d) SEM images of  $\text{CoFe}/\text{C}-\text{L}$ .

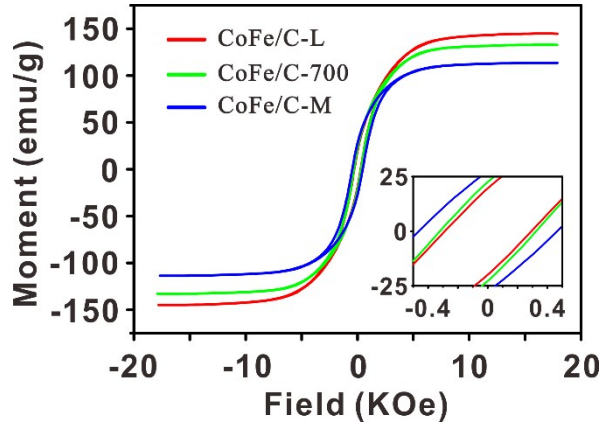

**Figure S5.** Room-temperature magnetization curve of CoFe/C hierarchical structures. For CoFe/C-L, the  $M_s$  value is 144.8 emu/g,  $H_c$  is 293.3 Oe. For CoFe/C-700, the  $M_s$  value is 132.8 emu/g,  $H_c$  is 324.5 Oe. For CoFe/C-M, the  $M_s$  value is 113.6 emu/g,  $H_c$  is 464.5 Oe.

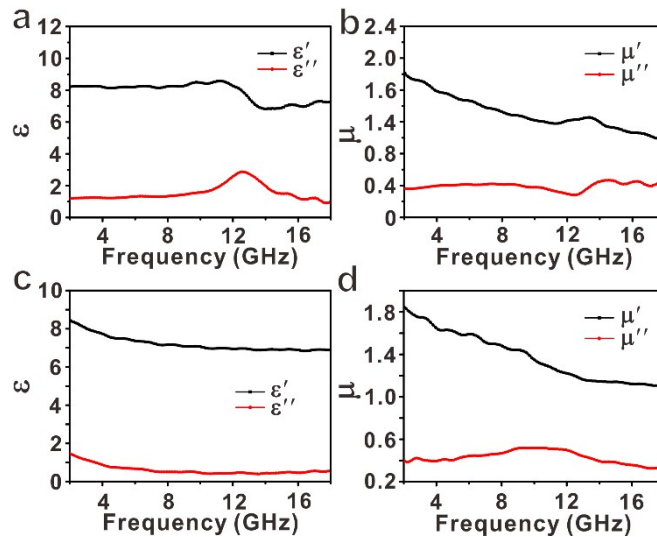

**Figure S6.** (a) Relative complex permittivity, (b) Relative complex permeability of the sample obtained by calcining  $\text{Co}_{0.5}\text{Fe}_{0.5}\text{O}(\text{OH})@\text{PR}$  precursors at 800 °C for 2 h; (c) Relative complex permittivity, (d) Relative complex permeability of the sample obtained by calcining  $\text{Co}_{0.5}\text{Fe}_{0.5}\text{O}(\text{OH})@\text{PR}$  precursors at 800 °C for 4 h.

**Table S1.** Iron cobalt ratio of iron cobalt oxide hydroxide hierarchical composites measured by EDX and ICP.

| Sample                     | Initial feed molar ratio<br>$(\frac{n_{Fe^{2+}}}{n_{Co^{2+}}})$ | Molar ratio of final product<br>$(\frac{n_{Fe}}{n_{Co}})$<br>by EDX | Molar ratio of final product<br>$(\frac{n_{Fe}}{n_{Co}})$<br>by ICP |
|----------------------------|-----------------------------------------------------------------|---------------------------------------------------------------------|---------------------------------------------------------------------|
| hydrated iron cobalt oxide | 1                                                               | 0.93                                                                | 0.94                                                                |

**Table S2.** Carbon contents and magnetic component contents of CoFe/C hierarchical composites measured by elementary analysis method.

| Samples    | The mass percent of carbon (wt %) | The mass percent of magnetic component (wt %) | Calcination temperature (°C) |
|------------|-----------------------------------|-----------------------------------------------|------------------------------|
| CoFe/C-700 | 21.7                              | 78.3                                          | 700                          |
| CoFe/C-M   | 27.5                              | 72.5                                          | 700                          |
| CoFe/C-L   | 16.7                              | 83.3                                          | 700                          |
